# Supplementary material for: The development of models to predict melting and pyrolysis point data associated with several hundred thousand compounds mined from PATENTS
Source: PubMed Central journal article supplement (PMC4724158; doi:10.1186/s13321-016-0113-y), 2016-01-22
Supplement: 13321_2016_113_MOESM1_ESM.pdf [file 13321_2016_113_MOESM1_ESM.pdf]

## Supplementary Information to article:

### The development of models to predict melting and pyrolysis point data associated with several hundreds thousands compounds mined from patents

Igor V. Tetko,<sup>1,\*</sup> Daniel Lowe<sup>2</sup> and Antony J. Williams<sup>3</sup>

1) Helmholtz Zentrum München für Gesundheit und Umwelt (HMGU), Institute of Structural Biology, Ingolstaedter Landstrasse 1, b. 60w, D-85764 Neuherberg, Germany and BigChem GmbH, D-85764 Neuherberg, Germany [i.tetko@helmholtz-muenchen.de](mailto:i.tetko@helmholtz-muenchen.de)

2) NextMove Software Limited, Innovation Centre (Unit 23), Cambridge Science Park, Cambridge CB4 0EY, UK, [daniel@nextmovesoftware.com](mailto:daniel@nextmovesoftware.com)

3) ChemConnector Inc., 904 Tamaras Circle, Wake Forest, NC-27587, USA, [Williams.Antony@epa.gov](mailto:Williams.Antony@epa.gov)

### Description of the protocols used to develop the Melting Point consensus model.

|                                                                                                                              |    |
|------------------------------------------------------------------------------------------------------------------------------|----|
| Overview.....                                                                                                                | 2  |
| Step 1. Data upload.....                                                                                                     | 2  |
| Step 2. Identification of LibSVM parameters. ....                                                                            | 3  |
| Step 2.1 Starting model development.....                                                                                     | 3  |
| 2.2 Selection of the dataset, method and validation protocol to identify the best set of LibSVM parameters. ....             | 4  |
| 2.3 Selection of preprocessing options.....                                                                                  | 5  |
| 2.4 Selection of Extended Functional Groups (EFGs) as descriptors. ....                                                      | 6  |
| 2.5 The descriptor unsupervised filtering options.....                                                                       | 7  |
| 2.6 Grid search to detect optimized parameters.....                                                                          | 8  |
| 2.7 The calculations are launched. ....                                                                                      | 9  |
| 2.8 Selection of Pending task window to monitor the execution of tasks.....                                                  | 10 |
| 2.9 Monitoring of the calculations in the PendingTask browser. ....                                                          | 10 |
| 2.10 The model is calculated.....                                                                                            | 11 |
| 2.11 The model is open (green button on the previous plot) and saved.....                                                    | 11 |
| 2.12 The optimal parameters of the model are used to create a new method template. ....                                      | 12 |
| 3. The development of multiple models is started using model template with optimized LibSVM parameters. ....                 | 13 |
| 3.1 Consensus model developed using the “Simple average” option.....                                                         | 14 |
| Step 4. The calculated models are accessed in the table – like Comprehensive Modeling (CM) view from “Baskets” web page..... | 15 |
| Step 4.1 An overview of the developed models in the Comprehensive Modeling (CM) window. ....                                 | 15 |

## Overview

Below, we summarize steps used for the development of the consensus model. The illustrative Figures are followed by a brief description of the respective step.

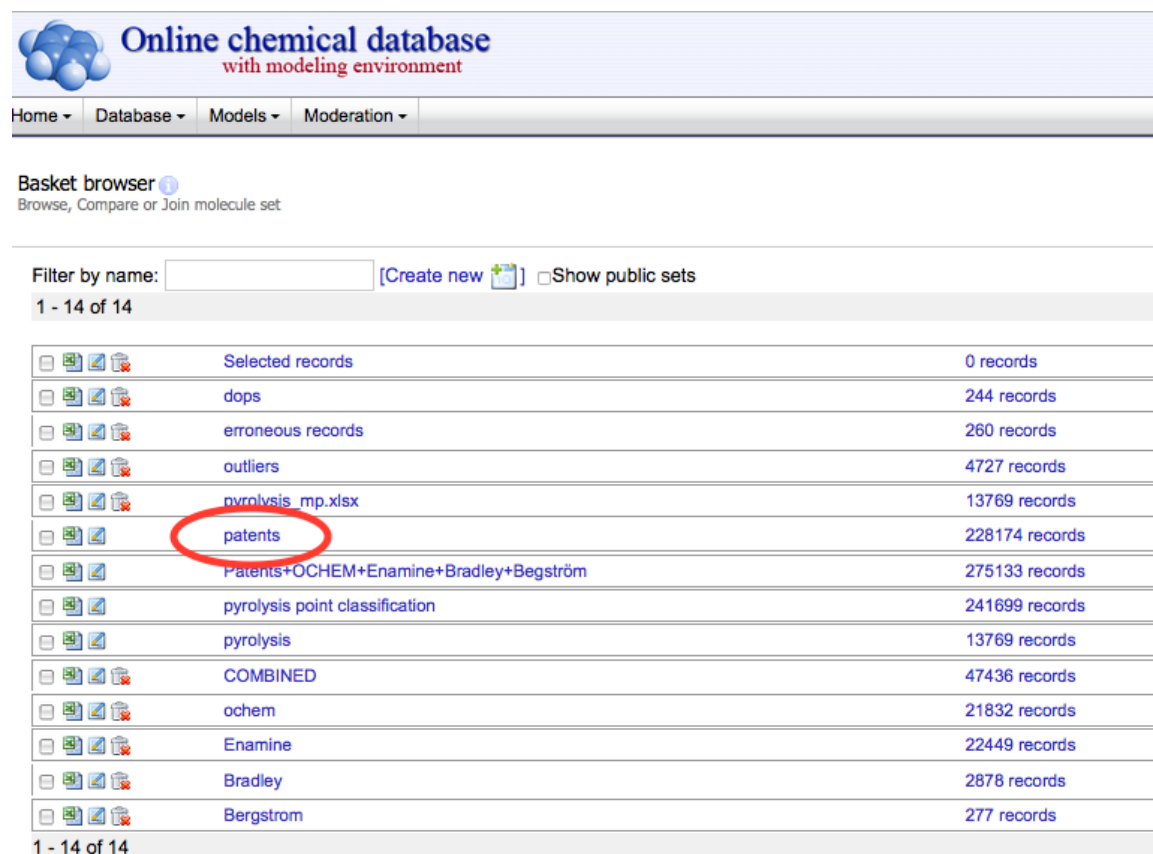

The screenshot shows the 'Online chemical database with modeling environment' interface. It includes a navigation menu with 'Home', 'Database', 'Models', and 'Moderation'. Below the menu is a 'Basket browser' section with a search filter and a list of records. The 'patents' record is circled in red.

| Filter by name:                                                                                                                                                                                                                                             | [Create new  | <input type="checkbox"/> Show public sets |
|-------------------------------------------------------------------------------------------------------------------------------------------------------------------------------------------------------------------------------------------------------------|-----------------------------------------------------------------------------------------------|-------------------------------------------|
| 1 - 14 of 14                                                                                                                                                                                                                                                |                                                                                               |                                           |
|          | Selected records                                                                              | 0 records                                 |
|          | dops                                                                                          | 244 records                               |
|          | erroneous records                                                                             | 260 records                               |
|    | outliers                                                                                      | 4727 records                              |
|    | pyrolysis_mp.xlsx                                                                             | 13769 records                             |
|    | patents                                                                                       | 228174 records                            |
|    | Patents+OCHEM+Enamine+Bradley+Begström                                                        | 275133 records                            |
|    | pyrolysis point classification                                                                | 241699 records                            |
|    | pyrolysis                                                                                     | 13769 records                             |
|    | COMBINED                                                                                      | 47436 records                             |
|    | ochem                                                                                         | 21832 records                             |
|    | Enamine                                                                                       | 22449 records                             |
|    | Bradley                                                                                       | 2878 records                              |
|    | Bergstrom                                                                                     | 277 records                               |
| 1 - 14 of 14                                                                                                                                                                                                                                                |                                                                                               |                                           |

### Step 1. Data upload.

The data for the Melting Point (MP) model are uploaded in the OCHEM database (for these steps see tutorial at <https://www.youtube.com/watch?v=vdjWiS4wSaQ>) and formed the basket "patents".

## Step 2. Identification of LibSVM parameters.

A preliminary analysis using a grid search (see Methods) was run to select the optimal parameters for the SVM model. It included the following several substeps.

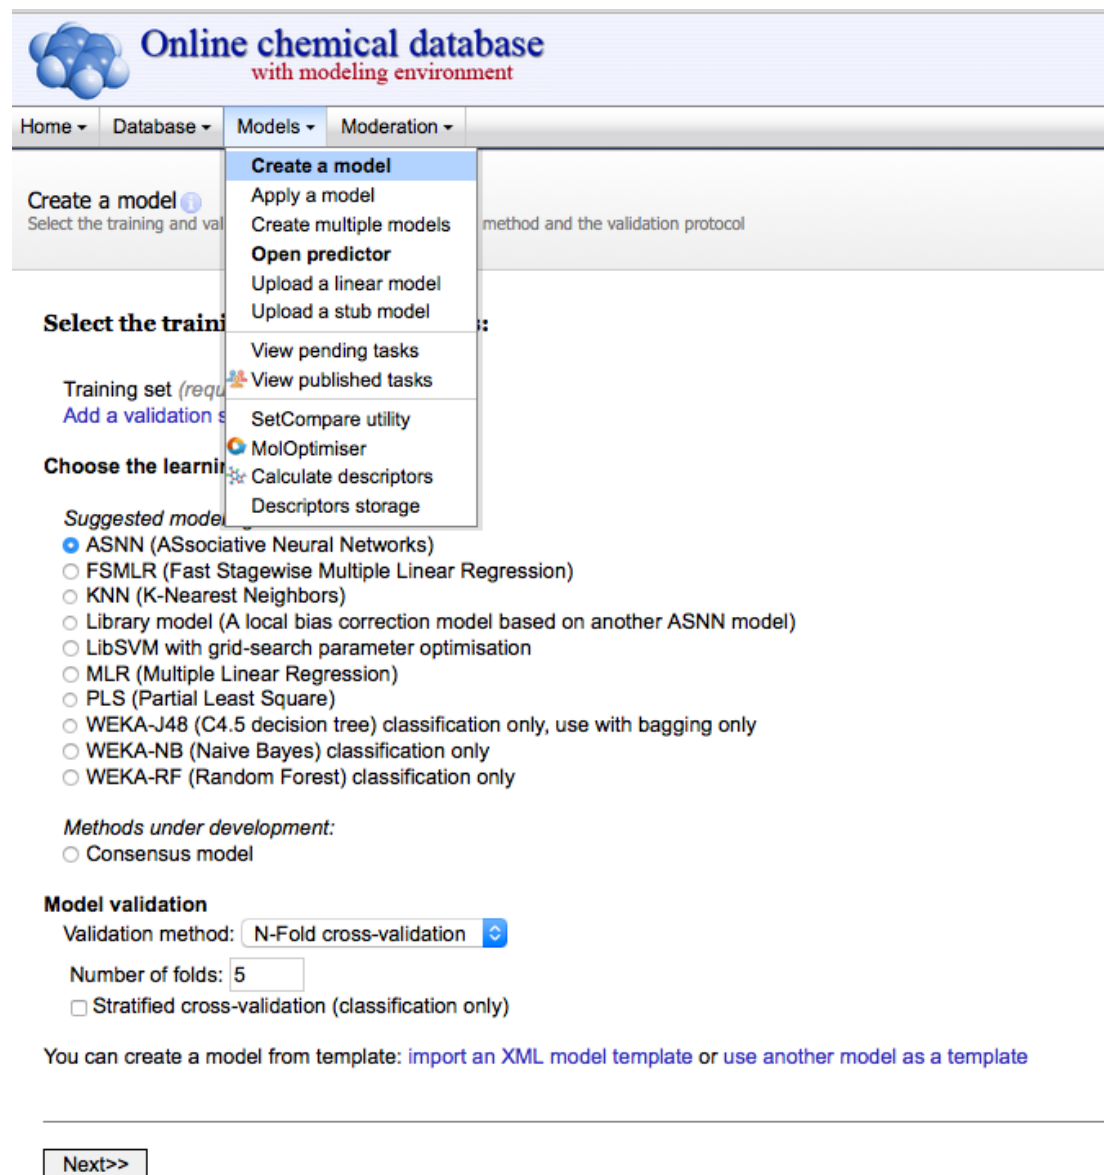

The screenshot shows the 'Online chemical database with modeling environment' interface. The 'Models' menu is open, displaying options such as 'Create a model', 'Apply a model', 'Create multiple models', 'Open predictor', 'Upload a linear model', 'Upload a stub model', 'View pending tasks', 'View published tasks', 'SetCompare utility', 'MolOptimiser', 'Calculate descriptors', and 'Descriptors storage'. The main page is titled 'Create a model' and includes sections for 'Select the training set', 'Choose the learning method', 'Suggested models' (with radio buttons for ASNN, FSMLR, KNN, Library model, LibSVM, MLR, PLS, WEKA-J48, WEKA-NB, and WEKA-RF), 'Methods under development' (Consensus model), and 'Model validation' (Validation method: N-Fold cross-validation, Number of folds: 5, and Stratified cross-validation checkbox). A 'Next>>' button is located at the bottom of the page.

### Step 2.1 Starting model development.

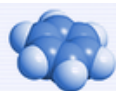

### Create a model ?

Select the training and validation sets, the machine learning method and the validation protocol

#### Select the training and validation sets:

Training set (*required*): [patents](#) [\[details\]](#)

[Add a validation set](#)

The model will predict this property:

Melting Point using unit: °C ▾

Choose the learning method: ?

*Suggested modeling methods:*

- ASNN (ASsociative Neural Networks)
- FSMLR (Fast Stagewise Multiple Linear Regression)
- KNN (K-Nearest Neighbors)
- Library model (A local bias correction model based on another ASNN model)
- LibSVM with grid-search parameter optimisation
- MLR (Multiple Linear Regression)
- PLS (Partial Least Square)
- WEKA-J48 (C4.5 decision tree) classification only, use with bagging only
- WEKA-NB (Naive Bayes) classification only
- WEKA-RF (Random Forest) classification only

*Methods under development:*

- Consensus model

#### Model validation

Validation method: No validation ▾

Development of a model without validation may lead to incorrect estimation of the prediction accuracy of your model.

You can create a model from template: [import an XML model template](#) or [use another model as a template](#)

Next>>

## 2.2 Selection of the dataset, method and validation protocol to identify the best set of LibSVM parameters.

Since the calculations in this step required very large CPU resources and LibSVM parameters were optimized for the whole set, “no validation” method was used. This method is normally not recommended since it can result in data overfitting. In this case only three LibSVM parameters were optimized for N = 228k compounds and thus there was no problem with overfitting. Notice that these calculations required more than 600 CPU-days of calculations.

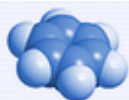

### Model creator

Select model template and training set

#### Select the preferred data preprocessing options

##### Preprocessing of molecules (Chemaxon) ⓘ

- Standardization
- Neutralize
- Remove salts
  
- Clean structure

##### Records with ranges

Include following records:

- Include interval records (*188857 records*)
- Include "greater" and "less" records (*5244 records*)

Handling of records with ranges:

- Use average values (for intervals) and boundary values (for greater and less ranges)
- Handle ranges as ranges (experimental)

<<Back

Next>>

### 2.3 Selection of preprocessing options.

The options included use of records with intervals and ranges for model development.

Model creator  
Select model template and training set

### Select the molecular descriptors

#### Recommended descriptor types

- E-state
- ALogPS (2)
- GSFragment (1138)
- Dragon v. 6.0 (4885/3D)
- ISIDA fragments
- ADRIANA.Code (211/3D)
- CDK descriptors (246/3D)
- 'Inductive' descriptors (54/3D)
- MERA descriptors (529/3D)
- MERSY descriptors (42/3D)
- Chemaxon descriptors (499/3D)
- QNPR
- Spectrophores (144/3D)
- Structural alerts (ToxAlerts)

#### Select alerts:

Publication

All articles

Endpoint

Extended Functional groups

Only approved alerts

#### Special descriptors (scaffolds, fingerprints):

- SIRMS
- Scaffold Hunter Descriptors
- Chemaxon Scaffolds
- Silicos-It Scaffolds
- ECFP Fingerprints
- MolPrint Fingerprints

Forbid NaN and Infinite descriptor values

<<Back Next>>

## 2.4 Selection of Extended Functional Groups (EFGs) as descriptors.

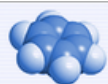

### Model creator

Select model template and training set

#### Select filters of descriptors

- Eliminate descriptors with less than  unique values
- Delete descriptors that have absolute values larger than
- Delete descriptors that have variance smaller than
- Group descriptors, that have pair-wise correlations Pearson's correlation coefficient  $R$  larger than
- Use Unsupervised Forward Selection to delete variables using the above value of multiple correlation coefficient  $R$
- After filtering, I want to select necessary descriptors myself (**advanced**)

#### Normalisation parameters

Descriptors normalization

Values normalization

<<Back

Next>>

## 2.5 The descriptor unsupervised filtering options

The normalization to [0,1] interval was selected. Other pre-processing options were used as default values.

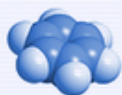

### Model creator

Select model template and training set

### Configure LibSVM method

#### SVM Method options

SVM algorithm  ▾  
Kernel type  ▾

- Use class weighting for classification tasks  
 Enable grid search

*Parameters are assigned values  $2^{(current\_step)}$  where  $current\_step = (min, min+step, \dots, max)$*

Cost min, max, step:  ,  ,

Gamma min,max,step:  ,  ,

Epsilon min,max,step:  ,  ,

Grid search set size  
(fraction of training set):

PARALLEL:

- Configure advanced options

### 2.6 Grid search to detect optimized parameters.

The calculations were configured to run in parallel on 1300 servers (option PARALLEL) and using the whole training set (fraction = 1).



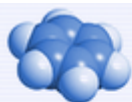

## Model creator

Select model template and training set

### Start calculation of the model

Now we are ready to start calculation.

Please provide the name for your model:

Save models

Task priority:

High priority (please, use for fast tasks only)

Normal priority

Low priority (for long tasks)

## 2.7 The calculations are launched.

Online chemical database  
with modeling environment

Home Database Models Moderation

Model creator  
Select model template and

Run model build

- Create a model
- Apply a model
- Create multiple models
- Open predictor
- Upload a linear model
- Upload a stub model
- View pending tasks
- View published tasks
- SetCompare utility
- MolOptimiser
- Calculate descriptors
- Descriptors storage

<<Back Next>>

Initializing the training set entries...  
[cancel] [fetch result later]

## 2.8 Selection of Pending task window to monitor the execution of tasks.

Online chemical database  
with modeling environment

Welcome, Dear Dr.Lowe! My account Logout

Home Database Models Moderation

Pending tasks  
The overview of all running tasks and all completed tasks awaiting your action

All tasks types All tasks statuses [Refresh] [Delete all matching tasks] Refresh every minute

1 - 14 of 14

| Task type / Time started                 | Model / Task name                                                                                               | Property / Set                                                  | Method   | Status   | Priority | Details                                                 |
|------------------------------------------|-----------------------------------------------------------------------------------------------------------------|-----------------------------------------------------------------|----------|----------|----------|---------------------------------------------------------|
| Model training<br>2015-11-22<br>15:10:59 | Melting Point_LibSVM_[StructuralAlerts], 248469                                                                 | Melting Point<br>patents                                        | LibSVM   | init     | normal   | Initializing the training set<br>[more>>] terminate     |
| Model training<br>2015-11-22<br>14:08:51 | Pyrolysis Point (qualitative)_WEKA-J48_[OEstate]_Bag                                                            | Pyrolysis Point (qualitative)<br>pyrolysis point classification | WEKA-J48 | assigned | low      | Processing task<br>Bagging - Runn<br>[more>>] terminate |
| Model training<br>2015-11-22<br>14:03:46 | Pyrolysis Point (qualitative)_WEKA-J48_[CDK (constitutional, topological, geometrical, electronic, hybrid)]_Bag | Pyrolysis Point (qualitative)<br>pyrolysis point classification | WEKA-J48 | assigned | low      | Processing task<br>Bagging - Runn<br>[more>>] terminate |
| Model training<br>2015-11-20<br>22:44:07 | Melting Point_LibSVM_[OEstate]                                                                                  | Melting Point<br>Patents+OCHEM+Enamine+Bradley+Begström         | LibSVM   | assigned | low      | Processing task<br>CrossValidatio<br>[more>>] terminate |
| Model training<br>2015-11-20<br>22:38:43 | Melting Point_LibSVM_[QNPR (SMILES - length 1 - 3 threshold 5)]                                                 | Melting Point<br>Patents+OCHEM+Enamine+Bradley+Begström         | LibSVM   | assigned | low      | Processing task<br>CrossValidatio<br>[more>>] terminate |
| Model training<br>2015-11-20<br>22:28:00 | Melting Point_LibSVM_[Fragmentor (Length 2 - 4)]                                                                | Melting Point<br>Patents+OCHEM+Enamine+Bradley+Begström         | LibSVM   | assigned | low      | Processing task<br>CrossValidatio<br>[more>>] terminate |

## 2.9 Monitoring of the calculations in the PendingTask browser.

Online chemical database  
with modeling environment

Welcome, Dear Dr.Lowe! [My account](#) [Log](#)

Home Database Models Moderation A+

**Pending tasks**  
The overview of all running tasks and all completed tasks awaiting your action

All tasks types [v] All tasks statuses [v] [Refresh] [Delete all matching tasks]  Refresh every minute

1 - 15 of 15

| Task type / Time started                 | Model / Task name                                  | Property / Set        | Method | Status   | Priority | Details                                                 |
|------------------------------------------|----------------------------------------------------|-----------------------|--------|----------|----------|---------------------------------------------------------|
| Model training<br>2015-11-22<br>15:27:34 | Melting Point_LibSVM_[StructuralAlerts]            | Melting Point patents | LibSVM | assigned | low      | Processing task<br>MolStandardize<br>[more>>] terminate |
| Model training<br>2015-11-22<br>15:18:59 | Melting Point_LibSVM_[StructuralAlerts],<br>248469 | Melting Point patent  | LibSVM | ready    | normal   | recalculate                                             |

## 2.10 The model is calculated.

The optimal parameters for the training set were calculated. They could be exported using XML icon at the left side of model row.

Online chemical database  
with modeling environment

Welcome, Dear Dr.Lowe! [My account](#) [Logout](#)

Home Database Models Moderation A+

Molecule sets X Basket models summary X Basket models summary X Basket models summary X Basket models summary X **Model profile X**

**Model creator**  
Select model template and training set

**Save the model**  
Please enter your model's name: Melting Point\_LibSVM\_

**Overview**

Model name: Melting Point\_LibSVM\_[StructuralAlerts] [rename] [StructuralAlerts]  
Private ID is 44458275

Predicted property: **Melting Point** modeled in °C  
Training method: LibSVM

| Data Set              | #              | R2            | q2            | RMSE         | MAE         |
|-----------------------|----------------|---------------|---------------|--------------|-------------|
| Training set: patents | 228174 records | 0.524 ± 0.002 | 0.523 ± 0.002 | 42.44 ± 0.08 | 32.6 ± 0.06 |

Correl. limit: 0.95 Variance threshold: 0.01  
Maximum value: 999999,  
classic algorithm, RBF  
5-fold cross-validation

3 pre-filtered descriptors  
epsilon-SVM, RBF(C=256, gamma=1,  
epsilon=16)

Calculated in 29152 seconds  
Size: 16234 Kb

Account for predicates ("<", ">" or intervals)

Download model statistics Create a copy of this model View configuration XML Export configuration XML MMP-based analysis (experimental)

Save Discard

## 2.11 The model is open (green button on the previous plot) and saved.

The optimized parameters for LibSVM are shown. They are part of the model template, which can be exported using the “Export configuration XML” button. The exported template can be used to develop new models (see step 2.1 – “import an XML model template”) using the same setting.

Online chemical database  
with modeling environment

Home Database Models Moderation

Comprehens  
Create multiple

The comprehensive  
Please note that run

Select the traini  
View pending tasks  
View published tasks

Training set (requ  
Add a validation

SetCompare utility  
MolOptimiser  
Calculate descriptors  
Descriptors storage

Select the methods you want to use for the modeling:

| Method                                                                                                                                                                                                                                                                                                                                                                                                                                                                                                                                                                                                                              | Descriptors                                                                                                                                                                                                                                                                                                                                                                                                                                                                                                                                                                                                                                                                                                                                                                                                                                                                                                                                                                                                                                                            | Descriptor selection                                                                                                                                                                                                                                                                      | Model validation                                                                                                                                                                                                                                                                                                                                                                                   |
|-------------------------------------------------------------------------------------------------------------------------------------------------------------------------------------------------------------------------------------------------------------------------------------------------------------------------------------------------------------------------------------------------------------------------------------------------------------------------------------------------------------------------------------------------------------------------------------------------------------------------------------|------------------------------------------------------------------------------------------------------------------------------------------------------------------------------------------------------------------------------------------------------------------------------------------------------------------------------------------------------------------------------------------------------------------------------------------------------------------------------------------------------------------------------------------------------------------------------------------------------------------------------------------------------------------------------------------------------------------------------------------------------------------------------------------------------------------------------------------------------------------------------------------------------------------------------------------------------------------------------------------------------------------------------------------------------------------------|-------------------------------------------------------------------------------------------------------------------------------------------------------------------------------------------------------------------------------------------------------------------------------------------|----------------------------------------------------------------------------------------------------------------------------------------------------------------------------------------------------------------------------------------------------------------------------------------------------------------------------------------------------------------------------------------------------|
| <input type="checkbox"/> [all] [none]<br><input type="checkbox"/> ANN<br><input checked="" type="checkbox"/> ASNN (bias correction)<br><input type="checkbox"/> KNN<br><input type="checkbox"/> LibSVM<br><input checked="" type="checkbox"/> FSMLR<br><input type="checkbox"/> MLRA<br><input checked="" type="checkbox"/> PLS<br><input type="checkbox"/> WEKA-RF (classification only)<br><input type="checkbox"/> WEKA-J48 (classification only)<br><input type="checkbox"/> LibSVM parallel [edit] [x]<br><input type="checkbox"/> LibSVM optimised 2 [edit] [x]<br><input checked="" type="checkbox"/> +add a custom template | <input type="checkbox"/> [all] [none]<br><input checked="" type="checkbox"/> CDK<br><input type="checkbox"/> Dragon v.6 (all blocks)<br><input checked="" type="checkbox"/> OEstate and ALogPS<br><input type="checkbox"/> ISIDA Fragments (Length 2 - 4)<br><input type="checkbox"/> GSfrag<br><input type="checkbox"/> Mera and Mersy<br><input type="checkbox"/> Chemaxon descriptors<br><input type="checkbox"/> Inductive Descriptors<br><input type="checkbox"/> Adriana<br><input type="checkbox"/> Spectrophores<br><input type="checkbox"/> QNPR (SMILES - length 1 - 3 threshold 5)<br><input type="checkbox"/> OEstate [edit] [x]<br><input type="checkbox"/> Drafon 5.4 [edit] [x]<br><input type="checkbox"/> MolPrint [edit] [x]<br><input type="checkbox"/> Functional groups<br><input type="checkbox"/> ECFP4<br><input checked="" type="checkbox"/> Mol. weight + # of carbons: baseline model<br><input type="checkbox"/> OEstate counts [edit] [x]<br><input type="checkbox"/> SIRMS<br><input checked="" type="checkbox"/> +add a custom template | <input type="checkbox"/> [all] [none]<br><input type="checkbox"/> Unsupervised forward selection<br><input checked="" type="checkbox"/> Pairwise decorrelation ( $r < 0.95$ )<br><input type="checkbox"/> No UFS [edit] [x]<br><input checked="" type="checkbox"/> +add a custom template | <input type="checkbox"/> [all] [none]<br><input checked="" type="checkbox"/> 5-fold cross-validation<br><input type="checkbox"/> 5-fold cross-validation (stratified - classification only)<br><input type="checkbox"/> Bagging with 64 models<br><input type="checkbox"/> Bagging with 64 models (stratified - classification only)<br><input checked="" type="checkbox"/> +add a custom template |

Show advanced options>>

Considering the selection above, 9 models will be created.

Create the models

## 2.12 The optimal parameters of the model are used to create a new method template.

The “Comprehensive Modeling” mode was opened and a template was created using the “add a custom template on “Models/Create multiple models” menu. The previously selected model with optimized parameters was used as the template. An experienced user can also manually edit the XML file in the browser. In this example template with optimized LibSVM parameters was created. In a similar way new templates for descriptors, unsupervised descriptor selection and model validation can be created. They could be combined to create multiple models.


**Online chemical database**  
 with modeling environment

Home ▾ Database ▾ Models ▾ Moderation ▾

Training set (required): patent [details]  
 Add a validation set

The model will predict this property:  
 Melting Point using unit: °C

**Select the methods you want to use for the modeling:**

| Method                                                                                                                                                                                                                                                                                                                                                                                                                                                                  | Descriptors                                                                                                                                                                                                                                                                                                                                                                                                                                                                                                                                                                                                                                                                                                                                                                                                                                                                                                                                                                                                                                                                                      | Descriptor selection                                                                                                                                                                                                                              | Model validation                                                                                                                                                                                                                                                                                                                                               |
|-------------------------------------------------------------------------------------------------------------------------------------------------------------------------------------------------------------------------------------------------------------------------------------------------------------------------------------------------------------------------------------------------------------------------------------------------------------------------|--------------------------------------------------------------------------------------------------------------------------------------------------------------------------------------------------------------------------------------------------------------------------------------------------------------------------------------------------------------------------------------------------------------------------------------------------------------------------------------------------------------------------------------------------------------------------------------------------------------------------------------------------------------------------------------------------------------------------------------------------------------------------------------------------------------------------------------------------------------------------------------------------------------------------------------------------------------------------------------------------------------------------------------------------------------------------------------------------|---------------------------------------------------------------------------------------------------------------------------------------------------------------------------------------------------------------------------------------------------|----------------------------------------------------------------------------------------------------------------------------------------------------------------------------------------------------------------------------------------------------------------------------------------------------------------------------------------------------------------|
| <input type="checkbox"/> ANN<br><input type="checkbox"/> ASNN (bias correction)<br><input type="checkbox"/> KNN<br><input type="checkbox"/> LibSVM<br><input type="checkbox"/> FSMLR<br><input type="checkbox"/> MLRA<br><input type="checkbox"/> PLS<br><input type="checkbox"/> WEKA-RF (classification only)<br><input type="checkbox"/> WEKA-J48 (classification only)<br><input checked="" type="checkbox"/> LibSVM optimised [edit] [x]<br>+add a custom template | <input type="checkbox"/> [all] [none]<br><input checked="" type="checkbox"/> CDK<br><input type="checkbox"/> Dragon v.6 (all blocks)<br><input type="checkbox"/> OEstate and ALogPS<br><input checked="" type="checkbox"/> ISIDA Fragments (Length 2 - 4)<br><input checked="" type="checkbox"/> GSFrag<br><input checked="" type="checkbox"/> Mers and Mersy<br><input checked="" type="checkbox"/> Chemaxon descriptors<br><input checked="" type="checkbox"/> Inductive Descriptors<br><input checked="" type="checkbox"/> Adriana<br><input type="checkbox"/> Spectrophores<br><input checked="" type="checkbox"/> QNPR (SMILES - length 1 - 3 threshold 5)<br><input checked="" type="checkbox"/> Drafn 5.4 [edit] [x]<br><input checked="" type="checkbox"/> MolPrint [edit] [x]<br><input checked="" type="checkbox"/> Functional groups<br><input checked="" type="checkbox"/> ECFP4<br><input type="checkbox"/> Mol. weight + # of carbons: baseline model<br><input checked="" type="checkbox"/> OEstate counts [edit] [x]<br><input type="checkbox"/> SIRMS<br>+add a custom template | <input type="checkbox"/> [all] [none]<br><input type="checkbox"/> Unsupervised forward selection<br><input checked="" type="checkbox"/> Pairwise decorrelation (r < 0.95)<br><input type="checkbox"/> No UFS [edit] [x]<br>+add a custom template | <input type="checkbox"/> [all] [none]<br><input checked="" type="checkbox"/> 5-fold cross-validation<br><input type="checkbox"/> 5-fold cross-validation (stratified - classification only)<br><input type="checkbox"/> Bagging with 64 models<br><input type="checkbox"/> Bagging with 64 models (stratified - classification only)<br>+add a custom template |

Hide advanced options

Skip duplicates (if a model with the same configuration already exist)

**Preprocessing of molecules (Chemaxon)**

Standardization  
 Neutralize  
 Remove salts  
 Clean structure

**Records with ranges**  
 Include following records:  
 Include "approximately equals" records  
 Include interval records  
 Include "greater" and "less" records

Handling of records with ranges:  
 Use average values (for intervals) and boundary values (for greater and less ranges)  
 Handle ranges as ranges (experimental)

Show mixture options>>

Override default normalisation options  
 Descriptors normalization: To range [0, 1] (e.g., for LibSVM)  
 Values normalization: Do not normalize

Save models

Considering the selection above, 13 models will be created.

### 3. The development of multiple models is started using model template with optimized LibSVM parameters.

For this article we used default settings for descriptors, descriptor selection and validation protocols as shown in the Figure above.

Models calculation was monitored in the Pending Task menu (see 2.8 and 2.9). Once models were finished, they were stored (each model individually, see step 2.11). After that they were used to develop a Consensus model using the "Consensus model" template and the same steps (2.1 and 2.2) used for the LibSVM model.

 **Online chemical database**  
with modeling environment

Home ▾ Database ▾ Models ▾ Moderation ▾

Model builder - Consensus model X Select a model X

**Model creator**  
Select model template and training set

---

**Choose the individual models for consensus**

In order to build a consensus model, you must select several (at least two) individual models based on the selected training set **patents**.

[\[Add a model\]](#)

Consensus type:  ▾

Ignore errors in individual submodels

---

### 3.1 Consensus model developed using the “Simple average” option.

 **Online chemical database**  
with modeling environment

Home ▾ Database ▾ Models ▾ Moderation ▾

Model builder - Consensus model X Select a model X

**Models applicator browser**

The complete list of models at OCHEM available for you is displayed below. If you are new here, you can also switch to a simplified OCHEM predictor

Model name or model ID:  and property name:  or by article id:

Models visibility:  ▾ Order by:  ▾

11 - 15 of 25   5   items on page  of 5

|                                     |                                                                                                                                                                                                                                                                                                                                                               |                                                                             |
|-------------------------------------|---------------------------------------------------------------------------------------------------------------------------------------------------------------------------------------------------------------------------------------------------------------------------------------------------------------------------------------------------------------|-----------------------------------------------------------------------------|
| <input checked="" type="checkbox"/> |    Melting Point_LibSVM_[OEstate]                                                                    | predicts Melting Point using patents (228174) validated by COMBINED (47436) |
| <input checked="" type="checkbox"/> |    Melting Point_LibSVM_[QNPR (SMILES - length 1 - 3 threshold 5)]                                   | predicts Melting Point using patents (228174) validated by COMBINED (47436) |
| <input checked="" type="checkbox"/> |    Melting Point_LibSVM_[ChemaxonDescriptors (7.4)]                                                  | predicts Melting Point using patents (228174) validated by COMBINED (47436) |
| <input checked="" type="checkbox"/> |    Melting Point_LibSVM_[Fragmentor (Length 2 - 4)]                                                  | predicts Melting Point using patents (228174) validated by COMBINED (47436) |
| <input checked="" type="checkbox"/> |    Melting Point_LibSVM_[CDK (constitutional, topological, geometrical, electronic, hybrid)], 244684 | predicts Melting Point using patents (228174) validated by COMBINED (47436) |

11 - 15 of 25   5   items on page  of 5

### 3.2 Selection of saved models for averaging in “Consensus model”.

Online chemical database  
with modeling environment

Welcome, Dear Dr.Lowel

Home Database Models Moderation

Basket  
Browse, C

Compound properties  
Properties  
Conditions  
Units  
Articles/Books  
Journals  
ToxAlerts  
MatchedPairs

Filter  
1 - 14

[Create new] Show public sets

|                         |                                |                |                                   |
|-------------------------|--------------------------------|----------------|-----------------------------------|
| Baskets                 | ords                           | 0 records      |                                   |
| Tags                    |                                | 244 records    | 1 models (+13 pending)            |
| Set area of interest... | ords                           | 260 records    |                                   |
| User-related changes    |                                | 4727 records   |                                   |
| My data exports         | xlsx                           | 13769 records  |                                   |
| Batch data upload       |                                | 228174 records | 36 models (+1 pending) [overview] |
| Trash                   | HEM+Enamine+Bradley+Begström   | 275133 records | 8 models (+5 pending) [overview]  |
|                         | pyrolysis point classification | 241699 records | 7 models (+2 pending) [overview]  |
|                         | pyrolysis                      | 13769 records  | 12 models [overview]              |
|                         | COMBINED                       | 47436 records  |                                   |
|                         | ochem                          | 21832 records  |                                   |
|                         | Enamine                        | 22449 records  |                                   |
|                         | Bradley                        | 2878 records   |                                   |
|                         | Bergstrom                      | 277 records    |                                   |

1 - 14 of 14

**Step 4. The calculated models are accessed in the table – like Comprehensive Modeling (CM) view from “Baskets” web page.**

Online chemical database  
with modeling environment

Home Database Models Moderation

Molecule sets X Basket models summary X Basket models summary X Basket models summary X Basket models summary X Model profile X

Multiple models overview

Predicted property: Melting Point  
Training set: patents (4 different versions detected)

Metrics: RMSE - Root Mean Square Error for Training + Excluded Validation: All validation protocols

|                                                                    | LibSVM | LibSVM (tr. set. 2) | LibSVM (tr. set. 3) | LibSVM (tr. set. 4) | MLRA  |
|--------------------------------------------------------------------|--------|---------------------|---------------------|---------------------|-------|
| CDK (constitutional, topological, geometrical, electronic, hybrid) | 38.93  | 38.87               | 38.84               | 38.88               | 45.3  |
| Fragmentor (Length 2 - 4)                                          | 38.49  | 38.22               | 38.33               | 38.43               | 45.17 |
| ChemaxonDescriptors (7.4)                                          | 40.07  | 40.13               | 40.1                | 40                  | 48.33 |
| QNPR (SMILES - length 1 - 3 threshold 5)                           | 39.74  | 39.24               | 39.44               | 39.69               | 46.4  |
| OEstate                                                            | 38.26  | 38.04               | 38.1                | 38.13               | 46.35 |

**Step 4.1 An overview of the developed models in the Comprehensive Modeling (CM) window.**

Models developed with individual sets of descriptors are shown. The columns correspond to sets formed by the exclusion of outlying molecules with different p-values. The models developed using MLRA calculate with much lower accuracy.
